# Supplementary material for: A new heart-like Co-containing polyoxoanion based on the lacunary Preyssler anion
Source: Royal Society of Chemistry journal article supplement (doi:10.1039/b800975a), 2008-01-01
Supplement: b800975a.pdf [file b800975a.pdf]

## Supporting information

### A New Heart-Like Co-Containing Polyoxoanion Based on the Lacunary Preyssler Anion

Zhiming Zhang,<sup>a</sup> Shuang Yao,<sup>a</sup> Yanfei Qi,<sup>a</sup> Yangguang Li,<sup>\*,a</sup> Yonghui Wang<sup>a</sup> and Enbo Wang<sup>\*,a</sup>

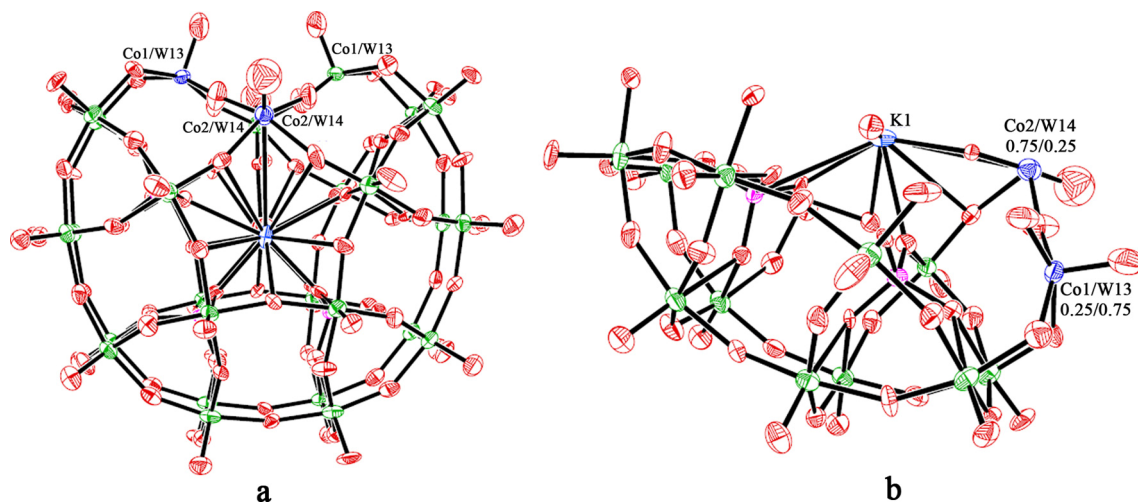

**Fig. S1.** (a) ORTEP drawing of polyoxoanion **2** with thermal ellipsoids at 50 % probability; (b) ORTEP drawing of the asymmetric unit of polyoxoanion **2** with thermal ellipsoids at 50 % probability.

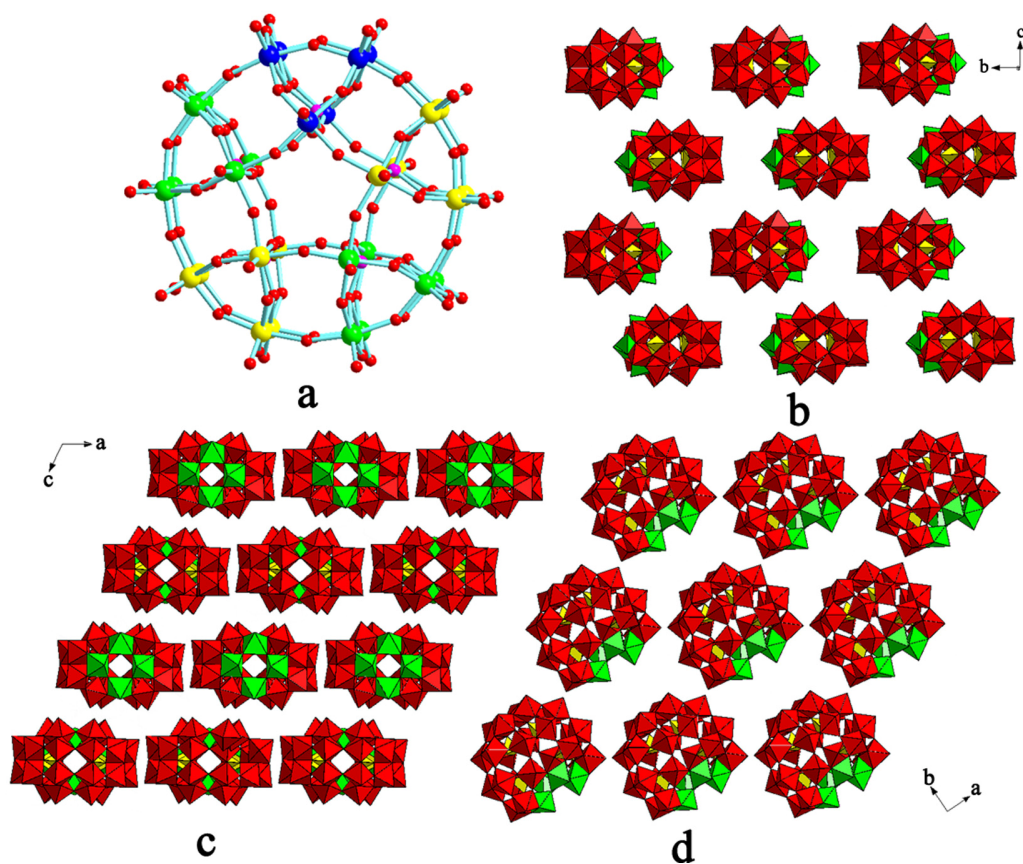

**Fig. S2.** (a) Polyhedral and ball-and-stick representation of anion  $[P_5W_{30}O_{110}]^{15-}$ , built up of five  $\{\alpha\text{-PW}_6\text{O}_{22}\}$  subunits. (b), (c), (d) polyhedral representation of the packing arrangements of polyoxoanion **2** viewed along different directions,  $K^+$ ,  $Na^+$  and the lattice water molecules are omitted for clarity. Color codes: W (red), P (yellow),  $\{W_2Co_2O_8(H_2O)_2\}$  (green) and O (red).

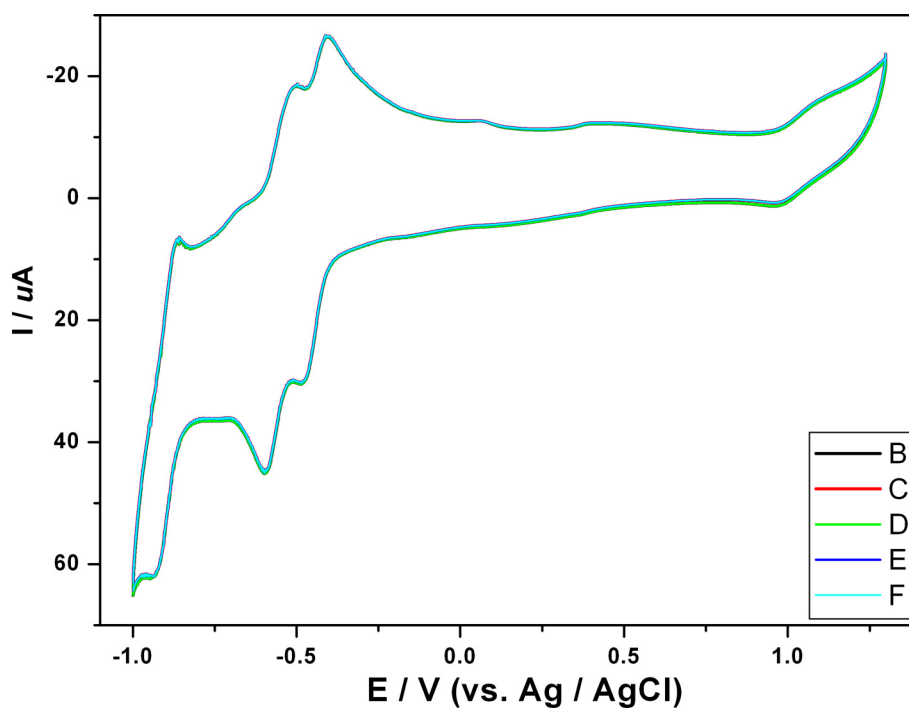

**Fig. S3.** The cyclic voltammogram of compound **1** ( $10^{-4}$  M) in a pH 4 buffer solution (0.4M  $\text{CH}_3\text{COONa} + \text{CH}_3\text{COOH}$ ). The CV curves were detected per 6 hours for five times.

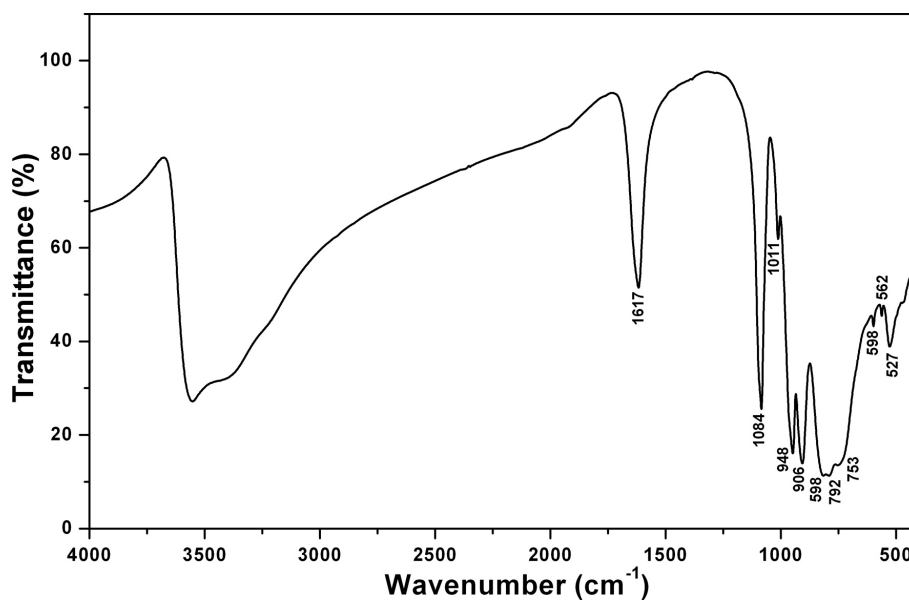

**Fig. S4.** IR spectrum for compound **1**.

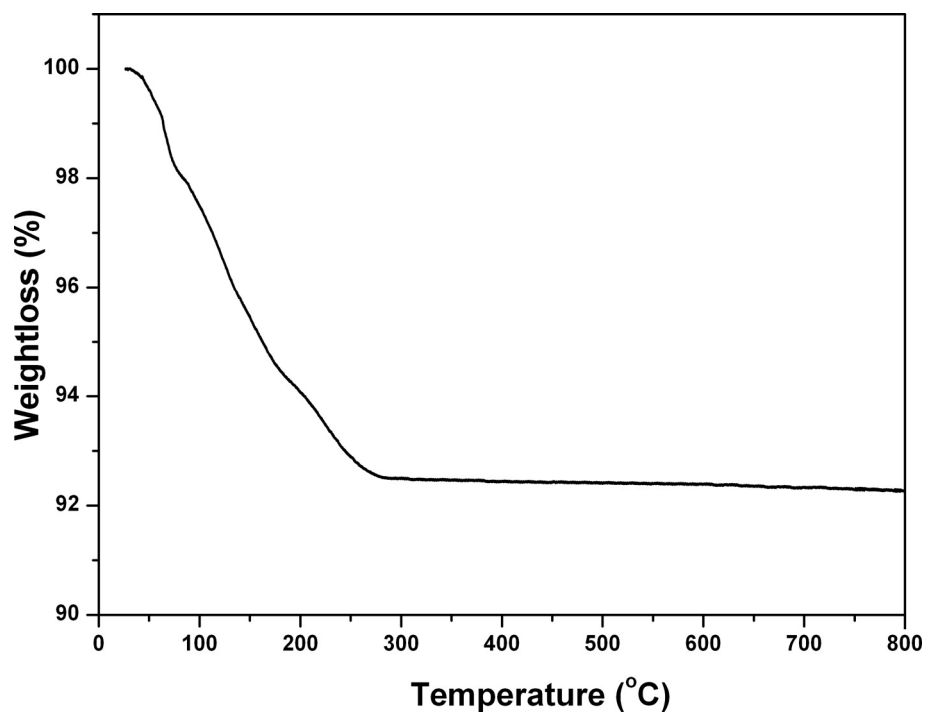

**Fig. S5.** The TG curve of compound **1**. The weight loss of 7.50 % in the range of 28 ~ 283 °C is attributed to the loss of all lattice and coordinated water molecules (calcd. 7.47 %).
